# Supplementary material
Source: MDPI journal article supplement (https://www.mdpi.com/2071-1050/11/10/2747)
Supplement: s1 [file s1]

## Sheet: LCA Data Details and PRO Calc
Food name for figures	Food Type	Food	Food name in source	Special Characteristics	Reported Global Warming Potential Value in Original Functional Unit	Original Functional Unit	GWP in kg CO2 per kg	Conversion Explanation	GWP in kg CO2-eq per 100 grams	System Boundaries	Allocation method for co-products	Attributional or other type of study?	Region of analysis	Other Notes	Source Year	Source Type	Citation (MLA or recommended format)	DIAAS (authors' calculations)	DIAAS notes	Serving Size in grams (RACCs reference where possible - else nutrition labels, indicated by gray and italicized entries)	Serving size in kg	GWP (kg CO2) per serving (kg)	Protein content in grams per 100 grams (=%protein)	Protein content source entry (USDA Food Composition Database https://ndb.nal.usda.gov/ndb/ unless specified)	Weighted Protein Content per serving	Weighted Protein Content per 100 grams
Beef	Meat	Beef	Beef	Conventional / organic mix	16	tons CO2-eq per 1 ton fresh weight	16	tons over tons to kg over kg = 1:1 ratio	1.6	Farm Gate	Not specified	Not specified	England and Wales	Included organic and conventional production as well as different forms of each food type in proportion to national production	2009	Journal Publication	Williams, A. G., E. Audsley, and D. L. Sandars. "Energy and environmental burdens of organic and non-organic agriculture and horticulture." Aspects of Applied Biology 79, What will organic farming deliver? COR 2006 (2006): 19-23.	99	Value for Beef steak	85	0.085	1.36	17.32	Beef, carcass, separable lean and fat, choice, raw	14.5748	17.1468
Beef	Meat	Beef	Beef	100% suckler	25300	kg CO2-eq per ton dead weight	25.3	1000 kg in a metric ton. Source does not offer conversion from dead weight to edible product	2.53	Farm Gate	Economic	Attributional	United Kingdom	Review article including attributional LCA's from OECD countries with non-organic production with economic allocation and at least cradle to farm-gate system boundaries	2010	Journal Publication	de Vries, Marion, and Imke JM de Boer. "Comparing environmental impacts for livestock products: A review of life cycle assessments." Livestock science 128.1-3 (2010): 1-11.	99	Value for Beef steak	85	0.085	2.1505	17.32	Beef, carcass, separable lean and fat, choice, raw	14.5748	17.1468
Beef	Meat	Beef	Beef	Lowland	15600	kg CO2-eq per ton dead weight	15.6	1000 kg in a metric ton. Source does not offer conversion from dead weight to edible product	1.56	Farm Gate	Economic	Attributional	United Kingdom	Review article including attributional LCA's from OECD countries with non-organic production with economic allocation and at least cradle to farm-gate system boundaries	2010	Journal Publication	de Vries, Marion, and Imke JM de Boer. "Comparing environmental impacts for livestock products: A review of life cycle assessments." Livestock science 128.1-3 (2010): 1-11.	99	Value for Beef steak	85	0.085	1.326	17.32	Beef, carcass, separable lean and fat, choice, raw	14.5748	17.1468
Beef	Meat	Beef	Beef	Hill and upland	16400	kg CO2-eq per ton dead weight	16.4	1000 kg in a metric ton. Source does not offer conversion from dead weight to edible product	1.64	Farm Gate	Economic	Attributional	United Kingdom	Review article including attributional LCA's from OECD countries with non-organic production with economic allocation and at least cradle to farm-gate system boundaries	2010	Journal Publication	de Vries, Marion, and Imke JM de Boer. "Comparing environmental impacts for livestock products: A review of life cycle assessments." Livestock science 128.1-3 (2010): 1-11.	99	Value for Beef steak	85	0.085	1.394	17.32	Beef, carcass, separable lean and fat, choice, raw	14.5748	17.1468
Beef	Meat	Beef	Beef	Non-organic	15800	kg CO2-eq per ton dead weight	15.8	1000 kg in a metric ton. Source does not offer conversion from dead weight to edible product	1.58	Farm Gate	Economic	Attributional	United Kingdom	Review article including attributional LCA's from OECD countries with non-organic production with economic allocation and at least cradle to farm-gate system boundaries	2010	Journal Publication	de Vries, Marion, and Imke JM de Boer. "Comparing environmental impacts for livestock products: A review of life cycle assessments." Livestock science 128.1-3 (2010): 1-11.	99	Value for Beef steak	85	0.085	1.343	17.32	Beef, carcass, separable lean and fat, choice, raw	14.5748	17.1468
Beef	Meat	Beef	Beef	Both specialist beef farms and dairy breeds	11	kg CO2-eq per kg live weight	25.5814	Source states edible over live weight ratio is 0.43, so divide live weight by 0.43 to get edible weight	2.55814	Farm Gate	Economic	Attributional	Ireland	Review article including attributional LCA's from OECD countries with non-organic production with economic allocation and at least cradle to farm-gate system boundaries	2010	Journal Publication	de Vries, Marion, and Imke JM de Boer. "Comparing environmental impacts for livestock products: A review of life cycle assessments." Livestock science 128.1-3 (2010): 1-11.	99	Value for Beef steak	85	0.085	2.17442	17.32	Beef, carcass, separable lean and fat, choice, raw	14.5748	17.1468
Beef	Meat	Beef	Beef	Conventional, dairy calves	17	kg CO2-eq per kg meat	17	No conversion needed	1.7	Farm Gate	Economic	Attributional	Sweden	Review article including attributional LCA's from OECD countries with non-organic production with economic allocation and at least cradle to farm-gate system boundaries	2010	Journal Publication	de Vries, Marion, and Imke JM de Boer. "Comparing environmental impacts for livestock products: A review of life cycle assessments." Livestock science 128.1-3 (2010): 1-11.	99	Value for Beef steak	85	0.085	1.445	17.32	Beef, carcass, separable lean and fat, choice, raw	14.5748	17.1468
Beef	Meat	Beef	Beef	N/A	59	kg CO2-eq per kg	59	No conversion needed	5.9	Not specified	Not specified	Consequential (although recorded values here are on attributional basis)	Brazil	Provides missed potential carbon sink as additional GHG emissions separated from conventional LCA GHG emissions. Conventional LCA GHG emissions are recorded here	2012	Journal Publication	Schmidinger, Kurt, and Elke Stehfest. "Including CO 2 implications of land occupation in LCAs—method and example for livestock products." The International Journal of Life Cycle Assessment 17.8 (2012): 962-972.	99	Value for Beef steak	85	0.085	5.015	17.32	Beef, carcass, separable lean and fat, choice, raw	14.5748	17.1468
Beef	Meat	Beef	Beef	Boneless, edible beef	48.4	kg CO2-eq per kg	48.4	No conversion needed	4.84	Cradle to farm gate	Economic	Not specified	USA	Functional unit was consumed boneless edible beef	2019	Journal Publication	Asem-Hiablie, Senorpe, et al. "A life cycle assessment of the environmental impacts of a beef system in the USA." The International Journal of Life Cycle Assessment 24.3 (2019): 441-455.	99	Value for Beef steak	85	0.085	4.114	17.32	Beef, carcass, separable lean and fat, choice, raw	14.5748	17.1468
Beef	Meat	Beef	Beef	N/A	38.3	kg CO2-eq per kg	38.3	No conversion needed	3.83	Not specified	Not specified	Consequential (although recorded values here are on attributional basis)	Ireland	Provides missed potential carbon sink as additional GHG emissions separated from conventional LCA GHG emissions. Conventional LCA GHG emissions are recorded here	2012	Journal Publication	Schmidinger, Kurt, and Elke Stehfest. "Including CO 2 implications of land occupation in LCAs—method and example for livestock products." The International Journal of Life Cycle Assessment 17.8 (2012): 962-972.	99	Value for Beef steak	85	0.085	3.2555	17.32	Beef, carcass, separable lean and fat, choice, raw	14.5748	17.1468
Beef	Meat	Beef	Beef	Simulated farm	22	kg CO2-eq per kg carcass	22	No conversion needed	2.2	Farm gate	Not specified	Not specified	Canada	Simulated farm	2010	Journal Publication	Beauchemin, Karen A., et al. "Life cycle assessment of greenhouse gas emissions from beef production in western Canada: A case study." Agricultural Systems 103.6 (2010): 371-379.	99	Value for Beef steak	85	0.085	1.87	17.32	Beef, carcass, separable lean and fat, choice, raw	14.5748	17.1468
Beef	Meat	Beef	Beef world average	Mean value	28.73	kg CO2-eq per kg	28.73	No conversion needed	2.873	Regional Distribution Center	Not specified	Not specified	World average	Systematic review	2017	Journal Publication	Clune, Stephen, Enda Crossin, and Karli Verghese. "Systematic review of greenhouse gas emissions for different fresh food categories." Journal of Cleaner Production 140 (2017): 766-783.	99	Value for Beef steak	85	0.085	2.44205	17.32	Beef, carcass, separable lean and fat, choice, raw	14.5748	17.1468
Bread	Grains	Bread	Bread	Low estimate across many bread types	0.5	kg CO2-eq per kg	0.5	No conversion needed	0.05	Cradle to bakery gate	Economic	Not specified	European Union	Assuming use of ingredients from countries across the EU	2017	Journal Publication	Notarnicola, Bruno, et al. "Energy flows and greenhouses gases of EU (European Union) national breads using an LCA (Life Cycle Assessment) approach." Journal of cleaner production 140 (2017): 455-469.	48	Value for dinner rolls	50	0.05	0.025	8.6	Rolls, dinner, wheat	2.064	4.128
Bread	Grains	Bread	Bread	High estimate across many bread types	6.6	kg CO2-eq per kg	6.6	No conversion needed	0.66	Cradle to bakery gate	Economic	Not specified	European Union	Assuming use of ingredients from countries across the EU	2017	Journal Publication	Notarnicola, Bruno, et al. "Energy flows and greenhouses gases of EU (European Union) national breads using an LCA (Life Cycle Assessment) approach." Journal of cleaner production 140 (2017): 455-469.	48	Value for dinner rolls	50	0.05	0.33	8.6	Rolls, dinner, wheat	2.064	4.128
Cheddar	Dairy	Cheese	Cheddar	Dry weight basis	8.6	kg CO2-eq per kg cheese	8.6	No conversion needed	0.86	Cradle to grave	Mass based, operations specific, and economic	Not specified	USA	Multiple allocation methodologies for different components of analysis	2013	Journal Publication	Kim, Daesoo, et al. "Life cycle assessment of cheese and whey production in the USA." The International Journal of Life Cycle Assessment 18.5 (2013): 1019-1035.	86	Value for cheddar	30	0.03	0.258	24.25	Cheese, cheddar, sharp, sliced	6.2565	20.855
Cheddar	Dairy	Cheese	Cheddar Cheese	N/A	14.02	kg CO2-eq per kg	14.02	No conversion needed	1.402	Cradle to grave	Not specified	Not specified	United Kingdom	Includes credit for energy recovery from whey through anaerobic digestion	2019	Journal Publication	Gosalvitr, Piya, et al. "Energy demand and carbon footprint of cheddar cheese with energy recovery from cheese whey." Energy Procedia 161 (2019): 10-16.	86	Value for cheddar	30	0.03	0.4206	24.25	Cheese, cheddar, sharp, sliced	6.2565	20.855
Cheddar	Dairy	Cheese	Cheese	Cheddar cheese	0.8	kg CO2-eq per kg	0.8	No conversion needed	0.08	Dairy plant gate	System expansion	Consequential	USA	Single-output assumption	2012	Transactions of the ASABE	Aguirre-Villegas, H. A., et al. "Life cycle impact assessment and allocation methods development for cheese and whey processing." Transactions of the ASABE 55.2 (2012): 613-627.	86	Value for cheddar	30	0.03	0.024	24.25	Cheese, cheddar, sharp, sliced	6.2565	20.855
Chicken	Meat	Chicken	Chicken	Conventional	4570	kg CO2-eq per ton dead weight	4.57	1000 kg in a metric ton. Source does not offer conversion from dead weight to edible product	0.457	Farm Gate	Economic	Attributional	United Kingdom	Review article including attributional LCA's from OECD countries with non-organic production with economic allocation and at least cradle to farm-gate system boundaries	2010	Journal Publication	de Vries, Marion, and Imke JM de Boer. "Comparing environmental impacts for livestock products: A review of life cycle assessments." Livestock science 128.1-3 (2010): 1-11.	164	Value for whole raw chicken	110	0.11	0.5027	18.6	Chicken, broilers or fryers, meat and skin, raw	33.5544	30.504
Chicken	Meat	Chicken	Chicken	Free range	5480	kg CO2-eq per ton dead weight	5.48	1000 kg in a metric ton. Source does not offer conversion from dead weight to edible product	0.548	Farm Gate	Economic	Attributional	United Kingdom	Review article including attributional LCA's from OECD countries with non-organic production with economic allocation and at least cradle to farm-gate system boundaries	2010	Journal Publication	de Vries, Marion, and Imke JM de Boer. "Comparing environmental impacts for livestock products: A review of life cycle assessments." Livestock science 128.1-3 (2010): 1-11.	164	Value for whole raw chicken	110	0.11	0.6028	18.6	Chicken, broilers or fryers, meat and skin, raw	33.5544	30.504
Chicken	Meat	Chicken	Chicken	Conventional	2079	kg CO2-eq per ton live weight	3.7125	1000 kg in a metric ton. Source states edible over live weight ratio is 0.56, so divide live weight by 0.56 to get edible weight	0.37125	Farm Gate	Economic	Attributional	France	Review article including attributional LCA's from OECD countries with non-organic production with economic allocation and at least cradle to farm-gate system boundaries	2010	Journal Publication	de Vries, Marion, and Imke JM de Boer. "Comparing environmental impacts for livestock products: A review of life cycle assessments." Livestock science 128.1-3 (2010): 1-11.	164	Value for whole raw chicken	110	0.11	0.408375	18.6	Chicken, broilers or fryers, meat and skin, raw	33.5544	30.504
Chicken	Meat	Chicken	Chicken	Mean value	4.12	kg CO2-eq per kg	4.12	No conversion needed	0.412	Regional Distribution Center	Not specified	Not specified	Not specified	Systematic review	2017	Journal Publication	Clune, Stephen, Enda Crossin, and Karli Verghese. "Systematic review of greenhouse gas emissions for different fresh food categories." Journal of Cleaner Production 140 (2017): 766-783.	164	Value for whole raw chicken	110	0.11	0.4532	18.6	Chicken, broilers or fryers, meat and skin, raw	33.5544	30.504
Chicken	Meat	Chicken	Chicken	N/A	2.6	kg CO2-eq per kg	2.6	No conversion needed	0.26	Not specified	Not specified	Consequential (although recorded values here are on attributional basis)	Brazil	Provides missed potential carbon sink as additional GHG emissions separated from conventional LCA GHG emissions. Conventional LCA GHG emissions are recorded here	2012	Journal Publication	Schmidinger, Kurt, and Elke Stehfest. "Including CO 2 implications of land occupation in LCAs—method and example for livestock products." The International Journal of Life Cycle Assessment 17.8 (2012): 962-972.	164	Value for whole raw chicken	110	0.11	0.286	18.6	Chicken, broilers or fryers, meat and skin, raw	33.5544	30.504
Chicken	Meat	Chicken	Chicken	N/A	2.6	kg CO2-eq per kg	2.6	No conversion needed	0.26	Not specified	Not specified	Consequential (although recorded values here are on attributional basis)	Netherlands	Provides missed potential carbon sink as additional GHG emissions separated from conventional LCA GHG emissions. Conventional LCA GHG emissions are recorded here	2012	Journal Publication	Schmidinger, Kurt, and Elke Stehfest. "Including CO 2 implications of land occupation in LCAs—method and example for livestock products." The International Journal of Life Cycle Assessment 17.8 (2012): 962-972.	164	Value for whole raw chicken	110	0.11	0.286	18.6	Chicken, broilers or fryers, meat and skin, raw	33.5544	30.504
Chicken	Meat	Chicken	Chicken	low estimate from study	5.2	kg CO2-eq per kg	5.2	No conversion needed	0.52	Distribution	Mass based	Attributional	Not specified	Provides a range of potential values for GWP	2015	Journal Publication	Smetana, Sergiy, et al. "Meat alternatives: life cycle assessment of most known meat substitutes." The International Journal of Life Cycle Assessment 20.9 (2015): 1254-1267.	164	Value for whole raw chicken	110	0.11	0.572	18.6	Chicken, broilers or fryers, meat and skin, raw	33.5544	30.504
Chicken	Meat	Chicken	Chicken	high estimate from study	5.82	kg CO2-eq per kg	5.82	No conversion needed	0.582	Distribution	Mass based	Attributional	Not specified	Provides a range of potential values for GWP	2015	Journal Publication	Smetana, Sergiy, et al. "Meat alternatives: life cycle assessment of most known meat substitutes." The International Journal of Life Cycle Assessment 20.9 (2015): 1254-1267.	164	Value for whole raw chicken	110	0.11	0.6402	18.6	Chicken, broilers or fryers, meat and skin, raw	33.5544	30.504
Chickpeas	Beans	Beans	Chick peas	Mean value	0.67	kg CO2-eq per kg	0.67	No conversion needed	0.067	Regional Distribution Center	Not specified	Not specified	Not specified	Systematic review	2017	Journal Publication	Clune, Stephen, Enda Crossin, and Karli Verghese. "Systematic review of greenhouse gas emissions for different fresh food categories." Journal of Cleaner Production 140 (2017): 766-783.	91	Value for garbanzos	130	0.13	0.0871	20.47	Chickpeas (garbanzo beans, bengal gram), mature seeds, raw	24.216	18.6277
Chickpeas	Beans	Beans	Chickpeas	N/A	3032.6	kg CO2-eq per ton	3.0326	1000 kg in a metric ton	0.30326	Farm gate	Not specified	Not specified	Iran	Data from 110 farms	2016	Journal Publication	Elhami, Behzad, Asadollah Akram, and Majid Khanali. "Optimization of energy consumption and environmental impacts of chickpea production using data envelopment analysis (DEA) and multi objective genetic algorithm (MOGA) approaches." Information processing in agriculture 3.3 (2016): 190-205.	91	Value for garbanzos	130	0.13	0.394238	20.47	Chickpeas (garbanzo beans, bengal gram), mature seeds, raw	24.216	18.6277
Eggs	Dairy	Eggs	Eggs	Conventional / organic mix	5.5	tons CO2-eq per 1 ton fresh weight	5.5	tons over tons to kg over kg = 1:1 ratio	0.55	Farm Gate	Not specified	Not specified	England and Wales	Included organic and conventional production as well as different forms of each food type in proportion to national production	2013	Journal Publication	Williams, A. G., E. Audsley, and D. L. Sandars. "Energy and environmental burdens of organic and non-organic agriculture and horticulture." Aspects of Applied Biology 79, What will organic farming deliver? COR 2006 (2006): 19-23.	136	Value for cooked eggs	110	0.11	0.605	12.58	Egg, whole, cooked, hard-boiled	18.8197	17.1088
Eggs	Dairy	Eggs	Eggs	Battery cage	3.9	kg CO2-eq per kg eggs	3.9	No conversion needed	0.39	Farm Gate	Economic	Attributional	The Netherlands	Review article including attributional LCA's from OECD countries with non-organic production with economic allocation and at least cradle to farm-gate system boundaries	2010	Journal Publication	de Vries, Marion, and Imke JM de Boer. "Comparing environmental impacts for livestock products: A review of life cycle assessments." Livestock science 128.1-3 (2010): 1-11.	136	Value for cooked eggs	110	0.11	0.429	12.58	Egg, whole, cooked, hard-boiled	18.8197	17.1088
Eggs	Dairy	Eggs	Eggs	Deep litter	4.3	kg CO2-eq per kg eggs	4.3	No conversion needed	0.43	Farm Gate	Economic	Attributional	The Netherlands	Review article including attributional LCA's from OECD countries with non-organic production with economic allocation and at least cradle to farm-gate system boundaries	2010	Journal Publication	de Vries, Marion, and Imke JM de Boer. "Comparing environmental impacts for livestock products: A review of life cycle assessments." Livestock science 128.1-3 (2010): 1-11.	136	Value for cooked eggs	110	0.11	0.473	12.58	Egg, whole, cooked, hard-boiled	18.8197	17.1088
Eggs	Dairy	Eggs	Eggs	Deep litter with outdoor run	4.6	kg CO2-eq per kg eggs	4.6	No conversion needed	0.46	Farm Gate	Economic	Attributional	The Netherlands	Review article including attributional LCA's from OECD countries with non-organic production with economic allocation and at least cradle to farm-gate system boundaries	2010	Journal Publication	de Vries, Marion, and Imke JM de Boer. "Comparing environmental impacts for livestock products: A review of life cycle assessments." Livestock science 128.1-3 (2010): 1-11.	136	Value for cooked eggs	110	0.11	0.506	12.58	Egg, whole, cooked, hard-boiled	18.8197	17.1088
Eggs	Dairy	Eggs	Eggs	Aviary with outdoor run	4.2	kg CO2-eq per kg eggs	4.2	No conversion needed	0.42	Farm Gate	Economic	Attributional	The Netherlands	Review article including attributional LCA's from OECD countries with non-organic production with economic allocation and at least cradle to farm-gate system boundaries	2010	Journal Publication	de Vries, Marion, and Imke JM de Boer. "Comparing environmental impacts for livestock products: A review of life cycle assessments." Livestock science 128.1-3 (2010): 1-11.	136	Value for cooked eggs	110	0.11	0.462	12.58	Egg, whole, cooked, hard-boiled	18.8197	17.1088
Eggs	Dairy	Eggs	Eggs	Mean value	3.39	kg CO2-eq per kg	3.39	No conversion needed	0.339	Regional Distribution Center	Not specified	Not specified	Not specified	Systematic review	2017	Journal Publication	Clune, Stephen, Enda Crossin, and Karli Verghese. "Systematic review of greenhouse gas emissions for different fresh food categories." Journal of Cleaner Production 140 (2017): 766-783.	136	Value for cooked eggs	110	0.11	0.3729	12.58	Egg, whole, cooked, hard-boiled	18.8197	17.1088
Gluten	Plant protein	Gluten	Gluten powder	low estimate from study	3.59	kg CO2-eq per kg	3.59	No conversion needed	0.359	Distribution	Mass based	Attributional	Not specified	Provides a range of potential values for GWP	2015	Journal Publication	Smetana, Sergiy, et al. "Meat alternatives: life cycle assessment of most known meat substitutes." The International Journal of Life Cycle Assessment 20.9 (2015): 1254-1267.	27	Value for seitan	85	0.085	0.30515	75.16	Vital wheat gluten	17.2492	20.2932
Gluten	Plant protein	Gluten	Gluten powder	high estimate from study	4.03	kg CO2-eq per kg	4.03	No conversion needed	0.403	Distribution	Mass based	Attributional	Not specified	Provides a range of potential values for GWP	2015	Journal Publication	Smetana, Sergiy, et al. "Meat alternatives: life cycle assessment of most known meat substitutes." The International Journal of Life Cycle Assessment 20.9 (2015): 1254-1267.	27	Value for seitan	85	0.085	0.34255	75.16	Vital wheat gluten	17.2492	20.2932
Grasshopper	Insect protein	Insect	Cricket	From cricket farm	2.57	kg CO2-eq per kg	2.57	No conversion needed	0.257	Cradle to gate	Mass based	Attributional	Thailand	Examined field cricket and house cricket	2017	Journal Publication	Halloran, A., et al. "Life cycle assessment of cricket farming in north-eastern Thailand." Journal of Cleaner Production 156 (2017): 83-94.	80	Value for grasshopper	100	0.1	0.257	36	Ssepuuya, Geoffrey, Ivan Muzira Mukisa, and Dorothy Nakimbugwe. "Nutritional composition, quality, and shelf stability of processed Ruspolia nitidula (edible grasshoppers)." Food science & nutrition 5.1 (2017): 103-112.	28.8	28.8
Ground Beef	Meat	Beef	Beef minced meat	Assumed to displace cheap pig meat	4.33	kg CO2-eq per kg	4.33	No conversion needed	0.433	Supermarket	Economic and system expansion	Consequential	Denmark	"environmental impacts associated with a demand for cattle meat is determined by the products the cattle meat displace in the market"	2007	SimaPro	Nielsen PH, Nielsen AM, Weidema BP, Dalgaard R and Halberg N (2003). LCA food data base.www.lcafood.dk.	80	Value for ground beef 25% fat	85	0.085	0.36805	25.07	Beef, ground, unspecified fat content, cooked	17.0476	20.056
Ham Lunch Meat	Meat	Pork	Ham (skinke)	Impact determined by price allocation	3.31	kg CO2-eq per kg	3.31	No conversion needed	0.331	Supermarket	Economic and system expansion	Consequential	Denmark	"environmental impacts associated with each class of pork have been determined by price allocation"	2007	SimaPro	Nielsen PH, Nielsen AM, Weidema BP, Dalgaard R and Halberg N (2003). LCA food data base.www.lcafood.dk.	126	Value for ham lunchmeat	85	0.085	0.28135	16.85	Ham, sliced, pre-packaged, deli meat (96% fat free, water added)	18.0464	21.231
Lentils	Lentils	Lentils	Lentils	Mean value	1.03	kg CO2-eq per kg	1.03	No conversion needed	0.103	Regional Distribution Center	Not specified	Not specified	Not specified	Systematic review	2017	Journal Publication	Clune, Stephen, Enda Crossin, and Karli Verghese. "Systematic review of greenhouse gas emissions for different fresh food categories." Journal of Cleaner Production 140 (2017): 766-783.	75	Value for lentils	50	0.05	0.0515	24.63	Lentils, raw	9.23625	18.4725
Lentils	Lentils	Lentils	Lentils	Conventional	4284.87	kg CO2-eq per ton	4.28487	1000 kg in a metric ton	0.428487	Farm gate	Not specified	Not specified	Iran	Based on modelled yields from an artificial neural network	2017	Journal Publication	Elhami, Behzad, Majid Khanali, and Asadollah Akram. "Combined application of Artificial Neural Networks and life cycle assessment in lentil farming in Iran." Information Processing in Agriculture 4.1 (2017): 18-32.	75	Value for lentils	50	0.05	0.214244	24.63	Lentils, raw	9.23625	18.4725
Mozzarella	Dairy	Cheese	Italian Mozzarella Cheese	Data from 3rd largest Italian producer	6.66	kg CO2-eq per kg cheese	6.66	No conversion needed	0.666	Cradle to grave	Allocation based on energy content of feed required to produce each product divided between milk and animal live weight	Not specified	Italy	Includes multiple scenairo analyses for allocation methods	2017	Journal Publication	Dalla Riva, A., et al. "Environmental life cycle assessment of Italian mozzarella cheese: Hotspots and improvement opportunities." Journal of dairy science 100.10 (2017): 7933-7952.	83	Value for mozzarella low moisture	30	0.03	0.1998	22.17	Cheese, mozzarella, whole milk	5.52033	18.4011
Mozzarella	Dairy	Cheese	Mozzarella	Dry weight basis	7.28	kg CO2-eq per kg cheese	7.28	No conversion needed	0.728	Cradle to grave	Mass based, operations specific, and economic	Not specified	USA	Multiple allocation methodologies for different components of analysis	2013	Journal Publication	Kim, Daesoo, et al. "Life cycle assessment of cheese and whey production in the USA." The International Journal of Life Cycle Assessment 18.5 (2013): 1019-1035.	83	Value for mozzarella low moisture	30	0.03	0.2184	22.17	Cheese, mozzarella, whole milk	5.52033	18.4011
Pasta	Grains	Pasta	Pasta pea (dry)	Pasta with .8 kg semolina, .2 kg pea protein flour, and .3 L water	1.22	kg CO2-eq per kg	1.22	No conversion needed	0.122	Cradle to grave	Not specified	Not specified	Not specified	N/A	2016	Journal Publication	Nette, Antonia, et al. "A comparison of carbon footprint and production cost of different pasta products based on whole egg and pea flour." Foods 5.1 (2016): 17.	36	Value for pasta spaghetti	140	0.14	0.1708	13.04	Pasta, dry, enriched	6.57216	4.6944
Pasta with egg	Grains	Pasta	Pasta egg (dry)	Pasta with .8 kg semolina, .2 kg whole egg powder, and .3 L water	1.79	kg CO2-eq per kg	1.79	No conversion needed	0.179	Cradle to grave	Not specified	Not specified	Not specified	N/A	2016	Journal Publication	Nette, Antonia, et al. "A comparison of carbon footprint and production cost of different pasta products based on whole egg and pea flour." Foods 5.1 (2016): 17.	36	Value for pasta spaghetti	140	0.14	0.2506	13.04	Pasta, dry, enriched	6.57216	4.6944
Pea protein flour	Plant protein	Pea protein	Pea protein flour	Protein flour for use in pasta	0.94	kg CO2-eq per kg protein	4	Divide by 0.235 to get weight because pea protein flour is 23.5% protein according to USDA	0.4	Cradle to grave	Not specified	Not specified	Not specified	Pea protein flour values are from study examining its potential in pasta, not on its own	2016	Journal Publication	Nette, Antonia, et al. "A comparison of carbon footprint and production cost of different pasta products based on whole egg and pea flour." Foods 5.1 (2016): 17.	77	Value for pea protein	27	0.027	0.108	77.78	Bob's Red Mill Pea Protein Powder Unsweetened Unflavored )only ingredient is pea protein isolate)	16.1705	59.8906
Peanut butter	Spreads	Peanut butter	Peanut butter	N/A	2.88	kg CO2-eq per kg	2.88	No conversion needed	0.288	Cradle to grave	Mass and economic allocation both used	Not specified	USA	N/A	2014	Transactions of the ASABE	McCarty, James A., et al. "Life cycle assessment of greenhouse gas emissions associated with production and consumption of peanut butter in the US." Transactions of the ASABE 57.6 (2014): 1741-1750.	56	Value for peanut butter	40	0.04	0.1152	24.06	Peanut butter, chunk style, without salt	5.38944	13.4736
Peanuts	Legumes	Legumes	Peanuts	Mean value	0.87	kg CO2-eq per kg	0.87	No conversion needed	0.087	Regional Distribution Center	Not specified	Not specified	Not specified	Systematic review	2017	Journal Publication	Clune, Stephen, Enda Crossin, and Karli Verghese. "Systematic review of greenhouse gas emissions for different fresh food categories." Journal of Cleaner Production 140 (2017): 766-783.	70	Value for raw peanuts	30	0.03	0.0261	25.8	Peanuts, all types, raw	5.418	18.06
Peanuts	Legumes	Peanuts	Peanuts	<.5 ha farm	327.69	kg CO2-eq per ton	0.32769	1000 kg in a metric ton	0.032769	Not specified	Not specified	Not specified	Iran	Examined three different farm sizes	2015	Journal Publication	Nikkhah, Amin, et al. "Environmental impacts of peanut production system using life cycle assessment methodology." Journal of Cleaner Production 92 (2015): 84-90.	70	Value for raw peanuts	30	0.03	0.0098307	25.8	Peanuts, all types, raw	5.418	18.06
Peanuts	Legumes	Peanuts	Peanuts	.5-1 ha farm	301.65	kg CO2-eq per ton	0.30165	1000 kg in a metric ton	0.030165	Not specified	Not specified	Not specified	Iran	Examined three different farm sizes	2015	Journal Publication	Nikkhah, Amin, et al. "Environmental impacts of peanut production system using life cycle assessment methodology." Journal of Cleaner Production 92 (2015): 84-90.	70	Value for raw peanuts	30	0.03	0.0090495	25.8	Peanuts, all types, raw	5.418	18.06
Peanuts	Legumes	Peanuts	Peanuts	>1 ha farm	302.21	kg CO2-eq per ton	0.30221	1000 kg in a metric ton	0.030221	Not specified	Not specified	Not specified	Iran	Examined three different farm sizes	2015	Journal Publication	Nikkhah, Amin, et al. "Environmental impacts of peanut production system using life cycle assessment methodology." Journal of Cleaner Production 92 (2015): 84-90.	70	Value for raw peanuts	30	0.03	0.0090663	25.8	Peanuts, all types, raw	5.418	18.06
Pinto beans	Beans	Beans	Beans: pinto USA dried	Dried pinto beans	0.73	kg CO2-eq per kg	0.73	No conversion needed	0.073	Regional Distribution Center	Not specified	Not specified	USA	Systematic review	2017	Journal Publication	Clune, Stephen, Enda Crossin, and Karli Verghese. "Systematic review of greenhouse gas emissions for different fresh food categories." Journal of Cleaner Production 140 (2017): 766-783.	74	Value for boiled pinto beans	86	0.086	0.06278	4.6	Beans, pinto, mature seeds, canned, solids and liquids	2.92744	3.404
Pork	Meat	Pork	Pig meat	Conventional / organic mix	6.4	tons CO2-eq per 1 ton fresh weight	6.4	tons over tons to kg over kg = 1:1 ratio	0.64	Farm Gate	Not specified	Not specified	England and Wales	Included organic and conventional production as well as different forms of each food type in proportion to national production	2010	Journal Publication	Williams, A. G., E. Audsley, and D. L. Sandars. "Energy and environmental burdens of organic and non-organic agriculture and horticulture." Aspects of Applied Biology 79, What will organic farming deliver? COR 2006 (2006): 19-23.	157	Value for pork tenderloin	85	0.085	0.544	26.17	Pork, fresh, loin, tenderloin, separable lean only, cooked, roasted	34.9239	41.0869
Pork	Meat	Pork	Pork	Conventional	77883	kg CO2-eq per ton protein	14.7978	1000 kg in a metric ton. Source states protein over edible weight ratio is 0.19, so multiply by 0.19 to get edible weight	1.47978	Farm Gate	Economic	Attributional	The Netherlands	Review article including attributional LCA's from OECD countries with non-organic production with economic allocation and at least cradle to farm-gate system boundaries	2010	Journal Publication	de Vries, Marion, and Imke JM de Boer. "Comparing environmental impacts for livestock products: A review of life cycle assessments." Livestock science 128.1-3 (2010): 1-11.	157	Value for pork tenderloin	85	0.085	1.25781	26.17	Pork, fresh, loin, tenderloin, separable lean only, cooked, roasted	34.9239	41.0869
Pork	Meat	Pork	Pork	Good agricultural practice	2.3	kg CO2-eq per kg live weight	4.33962	Source states edible over live weight ratio is 0.53, so divide live weight by 0.53 to get edible weight	0.433962	Farm Gate	Economic	Attributional	France	Review article including attributional LCA's from OECD countries with non-organic production with economic allocation and at least cradle to farm-gate system boundaries	2010	Journal Publication	de Vries, Marion, and Imke JM de Boer. "Comparing environmental impacts for livestock products: A review of life cycle assessments." Livestock science 128.1-3 (2010): 1-11.	157	Value for pork tenderloin	85	0.085	0.368868	26.17	Pork, fresh, loin, tenderloin, separable lean only, cooked, roasted	34.9239	41.0869
Pork	Meat	Pork	Pork	Red label	3.5	kg CO2-eq per kg live weight	6.60377	Source states edible over live weight ratio is 0.53, so divide live weight by 0.53 to get edible weight	0.660377	Farm Gate	Economic	Attributional	France	Review article including attributional LCA's from OECD countries with non-organic production with economic allocation and at least cradle to farm-gate system boundaries	2010	Journal Publication	de Vries, Marion, and Imke JM de Boer. "Comparing environmental impacts for livestock products: A review of life cycle assessments." Livestock science 128.1-3 (2010): 1-11.	157	Value for pork tenderloin	85	0.085	0.561321	26.17	Pork, fresh, loin, tenderloin, separable lean only, cooked, roasted	34.9239	41.0869
Pork	Meat	Pork	Pork	Heavier finishing	6080	kg CO2-eq per ton dead weight	6.08	1000 kg in a metric ton. Source does not offer conversion from dead weight to edible product	0.608	Farm Gate	Economic	Attributional	United Kingdom	Review article including attributional LCA's from OECD countries with non-organic production with economic allocation and at least cradle to farm-gate system boundaries	2010	Journal Publication	de Vries, Marion, and Imke JM de Boer. "Comparing environmental impacts for livestock products: A review of life cycle assessments." Livestock science 128.1-3 (2010): 1-11.	157	Value for pork tenderloin	85	0.085	0.5168	26.17	Pork, fresh, loin, tenderloin, separable lean only, cooked, roasted	34.9239	41.0869
Pork	Meat	Pork	Pork	Indoor breeding	6420	kg CO2-eq per ton dead weight	6.42	1000 kg in a metric ton. Source does not offer conversion from dead weight to edible product	0.642	Farm Gate	Economic	Attributional	United Kingdom	Review article including attributional LCA's from OECD countries with non-organic production with economic allocation and at least cradle to farm-gate system boundaries	2010	Journal Publication	de Vries, Marion, and Imke JM de Boer. "Comparing environmental impacts for livestock products: A review of life cycle assessments." Livestock science 128.1-3 (2010): 1-11.	157	Value for pork tenderloin	85	0.085	0.5457	26.17	Pork, fresh, loin, tenderloin, separable lean only, cooked, roasted	34.9239	41.0869
Pork	Meat	Pork	Pork	Outdoor breeding	6330	kg CO2-eq per ton dead weight	6.33	1000 kg in a metric ton. Source does not offer conversion from dead weight to edible product	0.633	Farm Gate	Economic	Attributional	United Kingdom	Review article including attributional LCA's from OECD countries with non-organic production with economic allocation and at least cradle to farm-gate system boundaries	2010	Journal Publication	de Vries, Marion, and Imke JM de Boer. "Comparing environmental impacts for livestock products: A review of life cycle assessments." Livestock science 128.1-3 (2010): 1-11.	157	Value for pork tenderloin	85	0.085	0.53805	26.17	Pork, fresh, loin, tenderloin, separable lean only, cooked, roasted	34.9239	41.0869
Pork	Meat	Pork	Pork	Conventional	6360	kg CO2-eq per ton dead weight	6.36	1000 kg in a metric ton. Source does not offer conversion from dead weight to edible product	0.636	Farm Gate	Economic	Attributional	United Kingdom	Review article including attributional LCA's from OECD countries with non-organic production with economic allocation and at least cradle to farm-gate system boundaries	2010	Journal Publication	de Vries, Marion, and Imke JM de Boer. "Comparing environmental impacts for livestock products: A review of life cycle assessments." Livestock science 128.1-3 (2010): 1-11.	157	Value for pork tenderloin	85	0.085	0.5406	26.17	Pork, fresh, loin, tenderloin, separable lean only, cooked, roasted	34.9239	41.0869
Pork	Meat	Pork	Pork	Single intensive pig farm	4.8	kg CO2-eq per kg bone-fat-free meat	4.8	1000 kg in a metric ton. Source does not offer conversion from dead weight to edible product	0.48	Farm Gate	Economic	Attributional	Sweden	Review article including attributional LCA's from OECD countries with non-organic production with economic allocation and at least cradle to farm-gate system boundaries	2010	Journal Publication	de Vries, Marion, and Imke JM de Boer. "Comparing environmental impacts for livestock products: A review of life cycle assessments." Livestock science 128.1-3 (2010): 1-11.	157	Value for pork tenderloin	85	0.085	0.408	26.17	Pork, fresh, loin, tenderloin, separable lean only, cooked, roasted	34.9239	41.0869
Pork	Meat	Pork	Pork	Conventional	3.7	kg CO2-eq per kg live weight	6.98113	Source states edible over live weight ratio is 0.53, so divide live weight by 0.53 to get edible weight	0.698113	Farm Gate	Economic	Attributional	The Netherlands	Review article including attributional LCA's from OECD countries with non-organic production with economic allocation and at least cradle to farm-gate system boundaries	2010	Journal Publication	de Vries, Marion, and Imke JM de Boer. "Comparing environmental impacts for livestock products: A review of life cycle assessments." Livestock science 128.1-3 (2010): 1-11.	157	Value for pork tenderloin	85	0.085	0.593396	26.17	Pork, fresh, loin, tenderloin, separable lean only, cooked, roasted	34.9239	41.0869
Pork	Meat	Pork	Pork	N/A	4.5	kg CO2-eq per kg	4.5	No conversion needed	0.45	Not specified	Not specified	Consequential (although recorded values here are on attributional basis)	Netherlands	Provides missed potential carbon sink as additional GHG emissions separated from conventional LCA GHG emissions. Conventional LCA GHG emissions are recorded here	2012	Journal Publication	Schmidinger, Kurt, and Elke Stehfest. "Including CO 2 implications of land occupation in LCAs—method and example for livestock products." The International Journal of Life Cycle Assessment 17.8 (2012): 962-972.	157	Value for pork tenderloin	85	0.085	0.3825	26.17	Pork, fresh, loin, tenderloin, separable lean only, cooked, roasted	34.9239	41.0869
Pork	Meat	Pork	Pork world average	Mean value	5.85	kg CO2-eq per kg	5.85	No conversion needed	0.585	Regional Distribution Center	Not specified	Not specified	World average	Systematic review	2017	Journal Publication	Clune, Stephen, Enda Crossin, and Karli Verghese. "Systematic review of greenhouse gas emissions for different fresh food categories." Journal of Cleaner Production 140 (2017): 766-783.	157	Value for pork tenderloin	85	0.085	0.49725	26.17	Pork, fresh, loin, tenderloin, separable lean only, cooked, roasted	34.9239	41.0869
Potatoes	Produce	Potatoes	Potatoes	Conventional / organic mix	0.24	tons CO2-eq per 1 ton fresh weight	0.24	tons over tons to kg over kg = 1:1 ratio	0.024	Farm Gate	Not specified	Not specified	England and Wales	Included organic and conventional production as well as different forms of each food type in proportion to national production	2007	Journal Publication	Williams, A. G., E. Audsley, and D. L. Sandars. "Energy and environmental burdens of organic and non-organic agriculture and horticulture." Aspects of Applied Biology 79, What will organic farming deliver? COR 2006 (2006): 19-23.	57	Value for baked potato	70	0.07	0.0168	2.63	Potatoes, Russet, flesh and skin, baked	1.04937	1.4991
Poultry	Meat	Poultry	Poultry meat	Conventional / organic mix	4.6	tons CO2-eq per 1 ton fresh weight	4.6	tons over tons to kg over kg = 1:1 ratio	0.46	Farm Gate	Not specified	Not specified	England and Wales	Included organic and conventional production as well as different forms of each food type in proportion to national production	2011	Journal Publication	Williams, A. G., E. Audsley, and D. L. Sandars. "Energy and environmental burdens of organic and non-organic agriculture and horticulture." Aspects of Applied Biology 79, What will organic farming deliver? COR 2006 (2006): 19-23.	164	Value for whole raw chicken	110	0.11	0.506	18.6	Chicken, broilers or fryers, meat and skin, raw	33.5544	30.504
Rye bread	Grains	Bread	Rye bread	Conventional rye bread	731	g CO2-eq per kg	0.731	1000 grams per kg	0.0731	Cradle to grave	System expansion	Attributional	Denmark	Industrial bakery supply chain	2014	Journal Publication	Jensen, Jesper Kronborg, and Jan Stentoft Arlbjørn. "Product carbon footprint of rye bread." Journal of cleaner production82 (2014): 45-57.	49	Value for rye bread	50	0.05	0.03655	8.5	Bread, rye	2.0825	4.165
Salmon	Meat	Fish	Farmed salmon	Live-weight salmon	2160	kg CO2-eq per ton	2.16	1000 kg in a metric ton	0.216	Cradle to farm gate	Gross chemical energy	Not specified	Global average from Norway, United Kingdom, Canada, and Chile		2009	Journal Publication	Pelletier, Nathan, et al. "Not all salmon are created equal: life cycle assessment (LCA) of global salmon farming systems." (2009): 8730-8736.	169	Value for baked Atlantic salmon	85	0.085	0.1836	25.44	Fish, salmon, Atlantic, wild, cooked, dry heat	36.5446	42.9936
Salmon	Meat	Fish	Farmed salmon	Live-weight salmon	1790	kg CO2-eq per ton	1.79	1000 kg in a metric ton	0.179	Cradle to farm gate	Gross chemical energy	Not specified	Norway	N/A	2009	Journal Publication	Pelletier, Nathan, et al. "Not all salmon are created equal: life cycle assessment (LCA) of global salmon farming systems." (2009): 8730-8736.	169	Value for baked Atlantic salmon	85	0.085	0.15215	25.44	Fish, salmon, Atlantic, wild, cooked, dry heat	36.5446	42.9936
Salmon	Meat	Fish	Farmed salmon	Live-weight salmon	3270	kg CO2-eq per ton	3.27	1000 kg in a metric ton	0.327	Cradle to farm gate	Gross chemical energy	Not specified	United Kingdom	N/A	2009	Journal Publication	Pelletier, Nathan, et al. "Not all salmon are created equal: life cycle assessment (LCA) of global salmon farming systems." (2009): 8730-8736.	169	Value for baked Atlantic salmon	85	0.085	0.27795	25.44	Fish, salmon, Atlantic, wild, cooked, dry heat	36.5446	42.9936
Salmon	Meat	Fish	Farmed salmon	Live-weight salmon	2370	kg CO2-eq per ton	2.37	1000 kg in a metric ton	0.237	Cradle to farm gate	Gross chemical energy	Not specified	Canada	N/A	2009	Journal Publication	Pelletier, Nathan, et al. "Not all salmon are created equal: life cycle assessment (LCA) of global salmon farming systems." (2009): 8730-8736.	169	Value for baked Atlantic salmon	85	0.085	0.20145	25.44	Fish, salmon, Atlantic, wild, cooked, dry heat	36.5446	42.9936
Salmon	Meat	Fish	Farmed salmon	Live-weight salmon	2300	kg CO2-eq per ton	2.3	1000 kg in a metric ton	0.23	Cradle to farm gate	Gross chemical energy	Not specified	Chile	N/A	2009	Journal Publication	Pelletier, Nathan, et al. "Not all salmon are created equal: life cycle assessment (LCA) of global salmon farming systems." (2009): 8730-8736.	169	Value for baked Atlantic salmon	85	0.085	0.1955	25.44	Fish, salmon, Atlantic, wild, cooked, dry heat	36.5446	42.9936
Salmon, smoked	Meat	Fish	Smoked salmon	Farmed salmon	6.6	kg CO2-eq per kg fish	6.6	No conversion needed	0.66	Supermarket	Economic	Not specified	Norway	Report of a sustainability consulting service	2011	Report	Buchspies, Benedikt, Sunnie J. Tölle, and Niels Jungbluth. "Life cycle assessment of high-sea fish and salmon aquaculture." ESU-services Ltd., fair consulting in sustainability, Uster, Switzerland (2011).	169	Value for baked Atlantic salmon	85	0.085	0.561	18.28	Fish, salmon, chinook, smoked	26.2592	30.8932
Shrimp	Meat	Shrimp	Prawns/shrimp	Mean value	14.85	kg CO2-eq per kg	14.85	No conversion needed	1.485	Regional Distribution Center	Not specified	Not specified	World average	Systematic review	2017	Journal Publication	Clune, Stephen, Enda Crossin, and Karli Verghese. "Systematic review of greenhouse gas emissions for different fresh food categories." Journal of Cleaner Production 140 (2017): 766-783.	149	Value for steamed shrimp	85	0.085	1.26225	23.98	Crustaceans, shrimp, cooked	30.3707	35.7302
Soy protein isolate	Plant protein	Isolated soy protein	Isolated soy protein	provided for protein functional unit	2.4	kg CO2-eq per kg protein	2.96296	Divide by 0.81 to get weight because soy protein isolate is 81% protein according to USDA	0.296296	Not specified	Not specified	Not specified	Not specified	Taken from abstract, full text not available	2016	Journal Publication	Braun, Michelle, et al. "Sustainability of Soy Protein from Life Cycle Assessment." The FASEB Journal 30.1_supplement (2016): 894-5.	82	Value for soy protein powder	20	0.02	0.0592593	88.32	Soy protein isolate	14.4845	72.4224
Tempeh	Plant protein	Tempeh	Tempeh	N/A	1.1	kg CO2-eq per kg	1.1	No conversion needed	0.11	Not specified	Not specified	Consequential (although recorded values here are on attributional basis)	Netherlands	Provides missed potential carbon sink as additional GHG emissions separated from conventional LCA GHG emissions. Conventional LCA GHG emissions are recorded here	2012	Journal Publication	Schmidinger, Kurt, and Elke Stehfest. "Including CO 2 implications of land occupation in LCAs—method and example for livestock products." The International Journal of Life Cycle Assessment 17.8 (2012): 962-972.	56	Value for tempeh	85	0.085	0.0935	20.29	Tempeh	9.65804	11.3624
Tofu	Plant protein	Tofu	Tofu	Includes packaging	982	g CO2-eq per kg	0.982	1000 grams per kg	0.0982	Factory gate	100% allocation to tofu	Attributional	USA	23% of impact from packaging	2018	Journal Publication	Mejia, Alfredo, et al. "Greenhouse gas emissions generated by Tofu production: A case study." Journal of Hunger & Environmental Nutrition 13.1 (2018): 131-142.	49	Value for firm CaSO tofu	85	0.085	0.08347	17.27	Tofu, raw, firm, prepared with calcium sulfate	7.19295	8.4623
Tofu	Plant protein	Tofu	Tofu	N/A	2	kg CO2-eq per kg	2	No conversion needed	0.2	Not specified	Not specified	Consequential (although recorded values here are on attributional basis)	Netherlands and Belgium	Provides missed potential carbon sink as additional GHG emissions separated from conventional LCA GHG emissions. Conventional LCA GHG emissions are recorded here	2012	Journal Publication	Schmidinger, Kurt, and Elke Stehfest. "Including CO 2 implications of land occupation in LCAs—method and example for livestock products." The International Journal of Life Cycle Assessment 17.8 (2012): 962-972.	49	Value for firm CaSO tofu	85	0.085	0.17	17.27	Tofu, raw, firm, prepared with calcium sulfate	7.19295	8.4623
Tofu	Plant protein	Tofu	Tofu	low estimate from study	2.65	kg CO2-eq per kg	2.65	No conversion needed	0.265	Distribution	Mass based	Attributional	Not specified	Provides a range of potential values for GWP	2015	Journal Publication	Smetana, Sergiy, et al. "Meat alternatives: life cycle assessment of most known meat substitutes." The International Journal of Life Cycle Assessment 20.9 (2015): 1254-1267.	49	Value for firm CaSO tofu	85	0.085	0.22525	17.27	Tofu, raw, firm, prepared with calcium sulfate	7.19295	8.4623
Tofu	Plant protein	Tofu	Tofu	high estimate from study	2.78	kg CO2-eq per kg	2.78	No conversion needed	0.278	Distribution	Mass based	Attributional	Not specified	Provides a range of potential values for GWP	2015	Journal Publication	Smetana, Sergiy, et al. "Meat alternatives: life cycle assessment of most known meat substitutes." The International Journal of Life Cycle Assessment 20.9 (2015): 1254-1267.	49	Value for firm CaSO tofu	85	0.085	0.2363	17.27	Tofu, raw, firm, prepared with calcium sulfate	7.19295	8.4623
Tuna	Meat	Fish	Tuna	Frozen unprocessed tuna caught from ocean	1.8	tons CO2-eq per 1 ton frozen tuna	1.8	tons over tons to kg over kg = 1:1 ratio	0.18	Delivery to harbor	Not specified	Not specified	Spain	Included Skipjack and Yellowfin tuna caught in operations across Atlantic, Indian, and Pacific Oceans	2005	Journal Publication	Hospido, Almudena, and Peter Tyedmers. "Life cycle environmental impacts of Spanish tuna fisheries." Fisheries Research 76.2 (2005): 174-186.	173	Value for canned tuna in water	85	0.085	0.153	23.62	Fish, tuna, white, canned in water, drained solids	34.7332	40.8626
Wheat flour	Grains	Wheat	Bread wheat	Conventional / organic mix	0.8	tons CO2-eq per 1 ton fresh weight	0.8	tons over tons to kg over kg = 1:1 ratio	0.08	Farm Gate	Not specified	Not specified	England and Wales	Included organic and conventional production as well as different forms of each food type in proportion to national production	2006	Journal Publication	Williams, A. G., E. Audsley, and D. L. Sandars. "Energy and environmental burdens of organic and non-organic agriculture and horticulture." Aspects of Applied Biology 79, What will organic farming deliver? COR 2006 (2006): 19-23.	36	Value for wheat flour	30	0.03	0.024	9.61	Wheat flour, whole-grain, soft wheat	1.03788	3.4596
Whey	Dairy	Whey	Dry Whey	Byproduct of cheddar cheese	0.72	kg CO2-eq per kg	0.72	No conversion needed	0.072	Dairy plant gate	System expansion	Consequential	USA	Examines multiple allocation methodologies	2012	Transactions of the ASABE	Aguirre-Villegas, H. A., et al. "Life cycle impact assessment and allocation methods development for cheese and whey processing." Transactions of the ASABE 55.2 (2012): 613-627.	160	Value for whey protein powder	37	0.037	0.02664	11.73	Whey, acid, dried	6.94416	18.768
White Rice	Grains	Rice	Rice (GLO) market for Alloc Def S (excluding infrastructure processes)	N/A	2.02	kg CO2-eq per kg	2.02	No conversion needed	0.202	Supermarket	Not specified	Not specified	Not specified	N/A	2016	SimaPro	Wernet, G., Bauer, C., Steubing, B., Reinhard, J., Moreno-Ruiz, E., and Weidema, B., 2016. The ecoinvent database version 3 (part I): overview and methodology. The International Journal of Life Cycle Assessment, [online] 21(9), pp.1218–1230. Available at: <http://link.springer.com/10.1007/s11367-016-1087-8> [Accessed 20 04 2019].	68	Value for cooked white rice	140	0.14	0.2828	2.69	Rice, white, long-grain, regular, enriched, cooked	2.56088	1.8292
Items in yellow did not specify certain parameters for LCA, but were still included for analysis due to limited data availability
Items in green specified parameters for LCA that did not match the majority of other specified LCA parameters, but were still included for analysis due to limited data availability

## Sheet: Protein Sources
Food	% of total protein consumption 2010	https://www.ers.usda.gov/data-products/food-availability-per-capita-data-system/ __________________________ Nutrients table from 2/1/2015
Meat, poultry, and fish	43.1
Dairy products	18.9
Eggs	3.6
Fats and oils	0.1
Citrus Fruits	0.4
Noncitrus Fruits	0.7
Legumes, nuts, and soy	6.4
White potatoes	1.7
Dark green, deep yellow vegetables	0.6
Other vegetables	1.5
Grain products	20.7
Sugars and Sweeteners	0
Miscellaneous	1.8
Total	99.5
Food	% Total Animal Protein NHANES from source Pasiakos, Stefan, et al. "Sources and amounts of animal, dairy, and plant protein intake of US adults in 2007–2010." Nutrients 7.8 (2015): 7058-7069.	"+-"	Pasiakos, Stefan, et al. "Sources and amounts of animal, dairy, and plant protein intake of US adults in 2007–2010." Nutrients 7.8 (2015): 7058-7069.
Chicken, whole pieces	13.9	0.5
Cold cuts and cured meats	9.2	0.2
Meat mixed dishes	7.3	0.3
Eggs and omelets	7.2	0.3
Beef, excludes ground	6.9	0.3
Ground beef	5.6	0.4
Fish	5	0.3
Poultry mixed dishes	4.8	0.3
Pork	4.5	0.3
Soups	3.1	0.3
Seafood mixed dishes	2.6	0.3
Pasta mixed dishes, excludes macaroni and cheese	2.4	0.2
Sausages	2.2	0.2
Frankfurters	2.1	0.2
Pizza	2	0.2
Stir-fry and soy-based sauce mixtrures	2	0.2
Food	% Total Dairy Protein NHANES from source Pasiakos, Stefan, et al. "Sources and amounts of animal, dairy, and plant protein intake of US adults in 2007–2010." Nutrients 7.8 (2015): 7058-7069.	"+-"	Pasiakos, Stefan, et al. "Sources and amounts of animal, dairy, and plant protein intake of US adults in 2007–2010." Nutrients 7.8 (2015): 7058-7069.
Cheese	23.4	0.6
Milk, reduced fat	11.3	0.5
Ice cream and frozen dairy desserts	6.4	0.3
Milk, nonfat	6.4	0.4
Milk, whole	5.8	0.3
Milk, low fat	4.7	0.3
Cream and cream substitutes	3.7	0.2
Eggs and omelets	3.4	0.2
Yogurt, low fat and nonfat	3.3	0.2
Coffee	2.1	0.2
Macaroni and cheese	2	0.3
Food	% Total Plant Protein NHANES from source Pasiakos, Stefan, et al. "Sources and amounts of animal, dairy, and plant protein intake of US adults in 2007–2010." Nutrients 7.8 (2015): 7058-7069.	"+-"	Pasiakos, Stefan, et al. "Sources and amounts of animal, dairy, and plant protein intake of US adults in 2007–2010." Nutrients 7.8 (2015): 7058-7069.
Yeast breads	11.6	0.3
Rolls and buns	5.9	0.3
Nuts and seeds	4.7	0.2
Pasta mixed dishes, exlcludes macaroni and cheese	3.1	0.2
Beans, peas, legumes	2.9	0.2
French fries and other fried white potatoes	2.6	0.1
Tortillas	2.5	0.27
Beer	2.3	0.12
Cookies and brownies	2.1	0.1
Ready to eat cereal, higher sugar	2.1	0.1
Ready to eat cereal, lower sugar	2.1	0.1
Rice	2.1	0.2
Coffee	2.1	0.1
Doughnuts, sweet rolls, pastries	2	0.1
